1 **Inactivation analysis of SARS-CoV-2 by specimen transport media, nucleic acid extraction**  
2 **reagents, detergents and fixatives**

3

4 Stephen R. Welch<sup>a†</sup>, Katherine A. Davies<sup>a†</sup>, Hubert Buczkowski<sup>a†</sup>, Nipunadi Hettiarachchi<sup>a</sup>,  
5 Nicole Green<sup>a</sup>, Ulrike Arnold<sup>a,b</sup>, Matthew Jones<sup>a</sup>, Matthew J. Hannah<sup>a</sup>, Reah Evans<sup>a</sup>, Christopher  
6 Burton<sup>a</sup>, Jane E. Burton<sup>a</sup>, Malcolm Guiver<sup>c</sup>, Patricia A. Cane<sup>a</sup>, Neil Woodford<sup>d</sup>, Christine B.  
7 Bruce<sup>a</sup>, Allen D. G. Roberts<sup>a</sup>, Marian J. Killip<sup>a#</sup>

8

9 <sup>a</sup> High Containment Microbiology, NIS Laboratories, National Infection Service, Public Health  
10 England, Colindale, London, UK

11 <sup>b</sup> UK Public Health Rapid Support Team, Public Health England/London School of Hygiene and  
12 Tropical Medicine, London, UK

13 <sup>c</sup> Virology Department, Clinical Sciences Laboratory, National Infection Service, Public Health  
14 England, Manchester Public Health Laboratory, Manchester, UK

15 <sup>d</sup> NIS Laboratories, National Infection Service, Public Health England, Colindale, London, UK

16

17 Running title: SARS-CoV-2 inactivation

18

19 <sup>#</sup> Corresponding author. E-mail: [marian.killip@phe.gov.uk](mailto:marian.killip@phe.gov.uk)

20 <sup>†</sup> Contributed equally to this work. Author order was determined on the basis of seniority.

21

22 Key words: COVID-19; SARS-CoV-2; coronavirus; inactivation; safety testing; specimen  
23 transport tubes; molecular extraction reagents; lysis buffers; clinical diagnostics;

24 **Abstract**

25           The COVID-19 pandemic has necessitated a rapid multi-faceted response by the  
26 scientific community, bringing researchers, health officials and industry together to address the  
27 ongoing public health emergency. To meet this challenge, participants need an informed  
28 approach for working safely with the etiological agent, the novel human coronavirus SARS-  
29 CoV-2. Work with infectious SARS-CoV-2 is currently restricted to high-containment  
30 laboratories, but material can be handled at a lower containment level after inactivation. Given  
31 the wide array of inactivation reagents that are being used in laboratories during this pandemic, it  
32 is vital that their effectiveness is thoroughly investigated. Here, we evaluated a total of 23  
33 commercial reagents designed for clinical sample transportation, nucleic acid extraction and  
34 virus inactivation for their ability to inactivate SARS-CoV-2, as well as seven other common  
35 chemicals including detergents and fixatives. As part of this study, we have also tested five  
36 filtration matrices for their effectiveness at removing the cytotoxic elements of each reagent,  
37 permitting accurate determination of levels of infectious virus remaining following treatment. In  
38 addition to providing critical data informing inactivation methods and risk assessments for  
39 diagnostic and research laboratories working with SARS-CoV-2, these data provide a framework  
40 for other laboratories to validate their inactivation processes and to guide similar studies for other  
41 pathogens.

42

## 43 **1. Introduction**

44 Infection with the novel human betacoronavirus SARS-CoV-2 can cause a severe or fatal  
45 respiratory disease, termed COVID-19 (1–3). As the COVID-19 pandemic has developed,  
46 millions of clinical samples have been collected for diagnostic evaluation. SARS-CoV-2 has  
47 been classified as a Hazard Group 3 pathogen in the UK, and as such, deliberate work with the  
48 virus must be carried out in high containment laboratories (containment level 3 (CL3) in the UK)  
49 with associated facility, equipment and staffing restrictions. Guidance from Public Health  
50 England (PHE) and the World Health Organization (WHO) enable non-propagative testing of  
51 clinical specimens to be carried out at the lower CL2, with the requirement that all non-  
52 inactivated material is handled within a microbiological safety cabinet (MSC) and that the  
53 process has been suitably and sufficiently risk assessed (4, 5). Guidance from the U.S. Centers  
54 for Disease Control and Prevention requires that specimens must be inactivated (e.g. in nucleic  
55 acid extraction buffer) before handling at biosafety level 2 (BSL-2) (6). To allow safe movement  
56 of clinical samples from CL3/BSL-3 laboratories to CL2/BSL-2, virus inactivation procedures  
57 should be validated, and formal validation of inactivation protocols are often an operational  
58 requirement for clinical and research laboratories handling SARS-CoV-2.

59 Efficacy of virus inactivation depends on numerous factors, including the nature and  
60 concentration of pathogen, sample matrix, concentration of inactivation agent/s and contact time.  
61 To date, there are limited data on efficacy of SARS-CoV-2-specific inactivation approaches in  
62 the scientific literature and risk assessments have largely been based upon inactivation  
63 information for genetically related coronaviruses. Previous studies have found that treatment  
64 with heat, chemical inactivants, ultraviolet light, gamma irradiation and a variety of detergents  
65 are effective at inactivating SARS-CoV-1 and Middle East Respiratory Syndrome coronavirus

66 (MERS-CoV), other high-consequence human coronaviruses (7–13). However, limited  
67 validation data exist for coronavirus inactivation by commercial sample transport media and  
68 molecular extraction lysis buffers used in steps prior to nucleic acid extraction for diagnostic  
69 testing. Furthermore, the precise composition of many commercial reagents is proprietary,  
70 preventing ingredient-based inference of inactivation efficacy between reagents. Some limited  
71 preliminary data on SARS-CoV-2 inactivation are available (14–19), but given the current level  
72 of diagnostic and research activities, there is an urgent need to comprehensively investigate  
73 SARS-CoV-2-specific inactivation efficacy of available methods to support safe virus handling.

74 An important consideration in inactivation assays is cytotoxicity, a typical effect of many  
75 chemical inactivants. To mitigate cytotoxic effects, the inactivation agent needs to be either  
76 diluted out or removed from treated samples prior to testing for infectious virus. Each of these  
77 methods for addressing cytotoxicity present their own challenges. Sample dilution requires the  
78 use of high titer stocks of virus (e.g.  $>10^8$  PFU/mL) to be able to demonstrate a significant titer  
79 reduction and reduces recovery of low level residual virus from treated samples, making it  
80 difficult or impossible to distinguish complete from incomplete virus inactivation. In contrast,  
81 methods for purification of virus away from cytotoxic components in treated samples may also  
82 remove virus or affect virus viability. Accurate quantification of remaining infectious virus  
83 ideally requires complete removal of cytotoxicity without compromising assay sensitivity, which  
84 needs careful consideration of reagent and purification processes prior to performing inactivation  
85 tests.

86 Here, we describe optimal methods for the removal of cytotoxicity from samples treated  
87 with commercial reagents, detergents and fixatives. These data were then used in evaluations of  
88 the effectiveness of these chemicals for inactivating SARS-CoV-2. This work, applicable to both

89 diagnostic and research laboratories, provides invaluable information for public health and basic  
90 research responses to the COVID-19 pandemic by supporting safe approaches for collection,  
91 transport, extraction and analysis of SARS-CoV-2 samples. Furthermore, our studies  
92 investigating purification of a wide range of cytotoxic chemicals are highly applicable to  
93 inactivation studies for other viruses, thereby supporting rapid generation of inactivation data for  
94 known and novel viral pathogens.  
95

## 96 **2. Materials and Methods**

### 97 **2.1. Cells and virus**

98 Vero E6 cells (Vero C1008; ATCC CRL-1586) were cultured in modified Eagle's  
99 minimum essential medium (MEM) supplemented with 10% (v/v) fetal calf serum (FCS). Virus  
100 used was SARS-CoV-2 strain hCoV-19/England/2/2020, isolated by PHE from the first patient  
101 cluster in the UK on 29/01/2020. This virus was obtained at passage 1 and used for inactivation  
102 studies at passage 2 or 3. All infectious work carried out using an MSCIII in a CL3 laboratory.  
103 Working virus stocks were generated by infecting Vero E6 cells at a multiplicity of infection  
104 (MOI) of 0.001, in the presence of 5% FCS. Cell culture supernatants were collected 72 hours  
105 post infection, clarified for 10 mins at  $3000 \times g$ , aliquoted and stored at  $-80^{\circ}\text{C}$  until required.  
106 Viral titers were calculated by either plaque assay or 50% tissue culture infectious dose  
107 (TCID<sub>50</sub>). For plaque assays, 24-well plates were seeded the day before the assay ( $1.5 \times 10^5$   
108 cells/well in MEM/10%FCS). Ten-fold dilutions of virus stock were inoculated onto plates  
109 (100 $\mu\text{L}$  per well), inoculated at room temperature for 1 hour then overlaid with 1.5% medium  
110 viscosity carboxymethylcellulose (Sigma-Aldrich) and incubated at  $37^{\circ}\text{C}/5\% \text{CO}_2$  for 3 days.  
111 For TCID<sub>50</sub>s, ten-fold dilutions of virus stock (25 $\mu\text{L}$ ) were plated onto 96-well plates containing  
112 Vero E6 cell suspension ( $2.5 \times 10^4$  cells/well in 100 $\mu\text{l}$  MEM/5%FCS) and incubated at  $37^{\circ}\text{C}/5\%$   
113  $\text{CO}_2$  for 5-7 days. Plates were fixed with 4% (v/v) formaldehyde/PBS, and stained with 0.2%  
114 (v/v) crystal violet/water TCID<sub>50</sub> titers were determined by the Spearman-Kärber method (20,  
115 21).

116

### 117 **2.2. Reagents and chemicals used for SARS-CoV-2 inactivation**

118           The commercial reagents evaluated in this study, along with their compositions (if  
119 known) and manufacturers' instructions for use (if provided) are given in Supplementary Table  
120 1. Specimen transport reagents tested were: Sigma Molecular Transport Medium (MM, Medical  
121 Wire); eNAT (Copan); Primestore Molecular Transport Medium (MTM, Longhorn Vaccines and  
122 Diagnostics); Cobas PCR Media (Roche); Aptima Specimen Transport Medium (Hologic);  
123 DNA/RNA Shield, (Zymo Research); guanidine hydrochloride (GCHI) and guanidine  
124 thiocyanate (GITC) buffers containing Triton X-100 (both Oxoid/Thermo Fisher); Virus  
125 Transport and Preservation Medium Inactivated (BioComma). Molecular extraction reagents  
126 tested were: AVL, RLT, ATL, and AL (all Qiagen); MagNA Pure external lysis buffer, and  
127 Cobas Omni LYS used for on-board lysis by Cobas extraction platforms (Roche); Viral PCR  
128 Sample Solution (VPSS) and Lysis Buffer (both E&O Laboratories); NeuMoDx Lysis Buffer  
129 (NeuMoDx Molecular); Samba II SCoV lysis buffer (Diagnostics for the Real World);  
130 NucliSENS lysis buffer (Biomerieux); Panther Fusion Specimen Lysis Tubes (Hologic); and an  
131 in-house extraction buffer containing guanidine thiocyanate and Triton X-100 (PHE Media  
132 Services). Detergents tested were: Tween 20, Triton X-100 and NP-40 Surfact-Amps Detergent  
133 Solutions (all Thermo Scientific), and UltraPure SDS 10% solution (Invitrogen). Other reagents  
134 assessed include: polyhexamethylene biguanide (PHMB, Blueberry Therapeutics);  
135 Formaldehyde and Glutaraldehyde (TAAB); and Ethanol and Methanol (Fisher Scientific).

136

### 137 **2.3. Removal of reagent cytotoxicity**

138           Specimen transport tube reagents were assessed undiluted unless otherwise indicated. For  
139 testing of molecular extraction reagents, mock samples were generated by diluting reagent in  
140 PBS at ratios given in manufacturer's instructions. Detergents, fixatives and solvents were all

141 assessed at the indicated concentrations. All methods were evaluated in a spin column format, for  
142 ease of sample processing within the high containment laboratory. Pierce Detergent Removal  
143 Spin Columns (0.5mL, Thermo Scientific), Microspin Sephacryl S400HR (GE Healthcare), and  
144 Amicon Ultra-0.5mL 50KDa centrifugal filters (Merck Millipore) were prepared according to  
145 manufacturer's instructions. Sephadex LH-20 (GE Healthcare) and Bio-Beads SM2 resin (Bio-  
146 Rad) were suspended in PBS and poured into empty 0.8mL Pierce centrifuge columns (Thermo  
147 Scientific), and centrifuged for one min at  $1000 \times g$  to remove PBS immediately before use. For  
148 all matrices aside from the Amicon Ultra columns, 100 $\mu$ l of treated sample was added to each  
149 spin column, incubated for two mins at room temperature, then eluted by centrifugation at 1,000  
150  $\times g$  for two mins. For Amicon Ultra filters, 500 $\mu$ l of sample was added, centrifuged at 14,000  $\times g$   
151 for 10 mins, followed by three washes with 500 $\mu$ l PBS. Sample was then collected by  
152 resuspending contents of the filtration device with 500 $\mu$ l PBS. To assess remaining cytotoxicity,  
153 a two-fold dilution series of treated filtered sample was prepared in PBS, and 6.5 $\mu$ l of each  
154 dilution transferred in triplicate to 384-well plates containing Vero E6 cells ( $6.25 \times 10^3$  cells/well  
155 in 25 $\mu$ l MEM/5%FCS) and incubated overnight. Cell viability was determined by CellTiter  
156 Aqueous One Solution Cell Proliferation Assay (Promega) according to manufacturer's  
157 instructions. Normalized values of absorbance (relative to untreated cells) were used to fit a 4-  
158 parameter equation to semilog plots of the concentration-response data, and to interpolate the  
159 concentration that resulted in 80% cell viability (CC20) in reagent treated cells. All analyses  
160 were performed using GraphPad Prism 8 (v8.4.1, GraphPad Software).

161

## 162 **2.4. SARS-CoV-2 inactivation**



163 For commercial products, virus preparations (tissue culture fluid, titers ranging from  $1 \times$   
164  $10^6$  to  $1 \times 10^8$  PFU/ml) were treated in triplicate with reagents at concentrations and for contact  
165 times recommended in the manufacturers' instructions for use, where available, or for  
166 concentrations and times specifically requested by testing laboratories. Where a range of  
167 concentrations was given by the manufacturer, the lowest ratio of product to sample was tested  
168 (i.e. lowest recommended concentration of test product). Specimen transport tube reagents were  
169 tested using a ratio of one volume of tissue culture fluid to ten volumes of reagent, unless a  
170 volume ratio of sample fluid to reagent was specified by the manufacturer. Detergents, fixatives  
171 and solvents were tested at the indicated concentrations for the indicated times. For testing of  
172 alternative sample types, virus was spiked into the indicated sample matrix at a ratio of 1:9, then  
173 treated with test reagents as above. All experiments included triplicate control mock-treated  
174 samples with an equivalent volume of PBS in place of test reagent. Immediately following the  
175 required contact time, 1mL of treated sample was processed using the appropriately selected  
176 filtration matrix. Reagent removal for inactivation testing was carried out in a larger spin column  
177 format using Pierce 4mL Detergent Removal Spin Columns (Thermo Fisher), or by filling empty  
178 Pierce 10mL capacity centrifuge columns (Thermo Fisher) with SM2 Bio-Beads, Sephacryl S-  
179 400HR or Sephadex LH-20 to give 4mL packed beads/resin. For purification using Amicon  
180 filters,  $2 \times 500\mu\text{l}$  samples were purified using two centrifugal filters by the method previously  
181 described, then pooled together. For formaldehyde and formaldehyde with glutaraldehyde  
182 removal, one filter was used with  $1 \times 500\mu\text{l}$  sample volume, resuspended after processing in  
183  $500\mu\text{l}$  PBS, and added to  $400\mu\text{l}$  MEM/5% FBS. For inactivation of infected monolayers,  $12.5$   
184  $\text{cm}^2$  flasks of Vero E6 cells ( $2.5 \times 10^6$  cells/flask in 2.5mL MEM/5% FBS) were infected at MOI  
185 0.001 and incubated at  $37^\circ\text{C}/5\% \text{CO}_2$  for 24 hours. Supernatant was removed, and cells fixed

186 using 5mL of formaldehyde, or formaldehyde and glutaraldehyde at room temperature for 15 or  
187 60 mins. The fixative was removed, and monolayers washed three times with PBS before  
188 scraping cells into 1mL MEM/5% FBS and sonicated (3 × 10 second on, 10 seconds off at 100%  
189 power and amplitude) using a UP200St with VialTweeter attachment (Hielscher Ultrasound  
190 Technology). Supernatants were clarified by centrifuging at 3000 × g for 10 mins.

191

## 192 **2.5. SARS-CoV-2 quantification and titer reduction evaluation**

193 Virus present in treated and purified, or mock-treated and purified, samples was  
194 quantified by either TCID50 or plaque assay. As additional assay controls, unfiltered mock-  
195 treated sample was titrated to determine virus loss during filtration, and filtered test-reagent only  
196 (no virus) sample titrated to determine residual test buffer cytotoxicity. For TCID50 assays, neat  
197 to 10<sup>-7</sup> ten-fold dilutions were prepared, and for plaque assays, neat to 10<sup>-5</sup> ten-fold dilutions  
198 were prepared, both in MEM/5% FCS. TCID50 titers were determined by the Spearman-Kärber  
199 method (20, 21). Conditions where low levels of virus were detected such that TCID50 could not  
200 be calculated by Spearman-Kärber, TCID50 was calculated the Taylor method (22). Where no  
201 virus was detectable, values are given as less than or equal to the Taylor-derived TCID50 titer  
202 given by a single virus positive well at the lowest dilution where no cytotoxicity was observed.  
203 Titer reduction was calculated by subtracting the mean logarithmic virus titer for test-buffer-  
204 treated, purified conditions from the mean logarithmic virus titer for the PBS-treated, purified  
205 condition, with standard errors calculated according to (22).

206

## 207 **2.6. Serial passages of treated samples**

208           In parallel to virus quantification, 12.5 cm<sup>2</sup> flasks of Vero E6 cells ( $6.25 \times 10^4$  cells/flask  
209 in 2.5mL MEM/5% FBS) were inoculated with either 500µl or 50µl of treated filtered sample.  
210 Flasks were examined for cytopathic effect (CPE) and 500µl culture medium from each flask  
211 was used to inoculate new 12.5 cm<sup>2</sup> flasks of Vero E6 cells after seven days. If no CPE was  
212 observed, this process was continued for up to four serial passages. For the duration of the  
213 passage series, a flask of untreated cells was included as a control for cross-contamination  
214 between flasks, and a SARS-CoV-2 infected control was included to ensure suitable conditions  
215 for virus propagation. To distinguish CPE from any residual cytotoxicity associated with test  
216 reagents, samples of cell culture medium were taken from each flask at the beginning and end of  
217 each passage. Nucleic acid was extracted from cell culture media manually using a QIAamp  
218 Viral RNA Mini Kit (QIAGEN) or using NucliSENS easyMAG or EMAG platforms (both  
219 BioMérieux). Viral RNA levels were quantified by quantitative reverse-transcriptase PCR (qRT-  
220 PCR) specific for the SARS-CoV-2 E gene (23) using TaqMan Fast 1-Step Master Mix (Applied  
221 Biosystems) on a 7500 Fast Real-Time PCR System (Applied Biosystems). A positive result for  
222 virus amplification was recorded if effects on the monolayer consistent with CPE and a decrease  
223 in Ct across the course of a passage were observed.  
224

## 225 **3. Results**

### 226 **3.1. Reagent filtration optimization to minimize cytotoxicity and maximum virus** 227 **recovery**

228 Prior to evaluating their effectiveness at inactivating SARS-CoV-2, we investigated the  
229 cytotoxicity of each reagent before and after filtration through one of five matrices: Sephadex  
230 LH-20, Sephacryl S400HR, Amicon Ultra 50kDa molecular weight cut-off centrifugal filters,  
231 Pierce detergent removal spin columns (DRSC), and Bio-Beads SM2 nonpolar polystyrene  
232 adsorbents. Reagents were diluted with PBS to the working concentrations recommended by the  
233 manufacturer (for commercial sample transport and molecular extraction reagents), or the  
234 indicated concentrations (for all other chemicals), followed by a single reagent removal step with  
235 each filtration matrix. Dilution series of filtered and unfiltered samples were generated to  
236 determine concentration-dependent cytotoxicity, from which the CC20 value for each  
237 combination of reagent and filtration method were interpolated (Supplementary Figure 1). CC20  
238 was chosen as, at this concentration, cells retain 80% viability and enable distinction of active  
239 SARS-CoV-2 replication by visualisation of CPE in the monolayer. Table 1 shows the dilution  
240 factor of reagent-treated sample required to achieve the CC20 after filtration, with <1 indicating  
241 complete removal of cytotoxicity. These data were used to determine the relative cytotoxicity  
242 removed by one filtration step for each combination of reagent and matrix (Figure 1A).

243 All unfiltered reagents tested here were cytotoxic, but the degree of cytotoxicity varied  
244 considerably as did the optimal filtration matrix for each reagent. The detergent Tween 20 used  
245 at 1% concentration was the least cytotoxic unfiltered, only requiring a dilution factor of 7.7 to  
246 reach the CC20, although only the Bio-Bead SM2 filters were effective at removing all  
247 cytotoxicity. The chemical fixative combination of 2% formaldehyde plus 1.5% glutaraldehyde

248 was the most cytotoxic unfiltered, requiring a dilution of over 4000 to reach the CC20, with only  
249 the Amicon Ultra columns able to remove 100% of the cytotoxicity. However, for the majority  
250 reagents (27/34) tested, filtration through at least one matrix type removed 100% of cytotoxicity  
251 allowing neat eluate to be used directly in cell culture without further dilution. There were  
252 several exceptions to this: DNA/RNA shield (maximum 99.4% cytotoxicity removal using  
253 SM2); 40% GHCl (99.1% using Pierce DRSC); 4M GITC (99.7% using Pierce DRSC); MagNA  
254 Pure (99.7% using SM2); AL buffer (87.4% using S400HR); Cobas Omni LYS (97.0% using  
255 SM2); and NeuMoDx (93.4% using S400HR). For these reagents, filtered eluate was still  
256 cytotoxic when used undiluted in cell culture. However, CC20 values indicated that this  
257 remaining cytotoxicity would be removed by first or second ( $10^{-1} - 10^{-2}$ ) dilutions in the TCID50  
258 assay allowing evaluation of titer reduction using these reagents with the caveat that the effective  
259 assay limit of detection (LOD) would be higher. Passing treated samples through more than one  
260 column, or increasing the depth of the resin/bead bed within the spin column can also improve  
261 cytotoxicity removal for some reagents (unpublished data).

262 In addition to cytotoxicity removal, a successful filtration method must also purify virus  
263 without adversely affecting titer or integrity. We therefore assessed SARS-CoV-2 recovery after  
264 each filtration method. Using an input titer of  $1.35 \times 10^6$  TCID50/mL, triplicate purifications of  
265 virus through Sephadex LH-20 or Pierce detergent removal spin columns resulted in recovery of  
266 100% of input virus (Figure 1B). In contrast, the recoverable titer after one filtration through  
267 Amicon Ultra filters was  $2.13 \times 10^5$  TCID50/mL, an 85% reduction from input. Purification with  
268 S400HR and Bio-Beads SM2 matrices resulted in recoverable titers of  $1.08 \times 10^6$  TCID50/mL  
269 and  $8.99 \times 10^5$  TCID50/mL, a loss of 30% and 35% of input virus, respectively.

270

### 271 **3.2. SARS-CoV-2 inactivation by specimen transport and molecular extraction reagents**

272 Specimen transport tubes are designed to inactivate microorganisms present in clinical  
273 specimens prior to sample transport, while preserving the integrity of nucleic acids for molecular  
274 testing. If effective, these products have the potential to streamline SARS-CoV-2 diagnostic  
275 processing in testing laboratories by eliminating the requirement for CL3 processing or, for  
276 activities derogated to CL2, permitting processing outside an MSC. The BS EN 14476 standard  
277 requires demonstration of a  $>4 \log_{10}$  titer reduction for virucidal suspension tests (22), and we  
278 were able to demonstrate a  $\geq 4 \log_{10}$  TCID50 titer reduction for all specimen transport media  
279 evaluated in a tissue culture fluid matrix (Table 2). However, infectious virus remained  
280 recoverable in treated samples after inactivation with most reagents tested (by either TCID50 or  
281 blind passage). The exceptions to this were PrimeStore MTM and 4M GITC, from which no  
282 residual virus was detectable by either TCID50 or by the passaging of treated purified sample.  
283 While several contact times were evaluated for all these reagents, length of contact time had no  
284 effect on either the level of virus titer reduction or whether virus remained detectable upon  
285 passage.

286 We also sought to inform sample processing by examining inactivation by molecular  
287 extraction lysis buffers used in several manual and automated extraction protocols within SARS-  
288 CoV-2 diagnostic and research laboratories. We could demonstrate a  $\geq 4 \log_{10}$  reduction in  
289 TCID50 titer for all but two molecular extraction reagents when evaluated using tissue culture  
290 fluid (Table 3). The exceptions to this were AL and Cobas Omni LYS, where remaining  
291 cytotoxicity in the filtered eluate increased the TCID50 LOD to a level such that the maximum  
292 calculable titer reductions were  $\geq 3.5$  and  $\geq 3.9 \log_{10}$  TCID50s, respectively. However, given no  
293 virus was detected at any passage it is likely that infectious virus was effectively inactivated by

294 these two reagents. For reagents tested with multiple contact times (NucliSENS, Panther Fusion),  
295 shorter times (10 mins) were as effective at reducing virus titers as longer contact times. Most  
296 reagents reduced viral titers to around the TCID50 assay LOD, indicating that any remaining  
297 virus post treatment was present only at very low titers (<10 TCID50/mL), but higher levels of  
298 virus were recoverable from samples treated with some extraction buffers. For NeuMoDx lysis  
299 buffer, although titers were reduced by  $\geq 4$  log<sub>10</sub> TCID50s, an average of 91 ( $\pm 38$ ) TCID50/mL  
300 remained detectable. Similarly, Buffer AVL reduced virus titers by 5.1 log<sub>10</sub> TCID50s, but after  
301 treatment virus was detectable in all treated samples replicates (average 54 ( $\pm 18$ ) TCID50/mL).  
302 However, addition of four sample volumes of absolute ethanol following a 10 minute contact  
303 time with AVL (the next step in the QIAGEN Viral RNA Mini Kit manual), a  $\geq 5.9$  log<sub>10</sub> titer  
304 reduction was recorded with no virus recoverable following passages in cell culture.

305 Panther Fusion lysis buffer was further tested against a relevant clinical sample matrix,  
306 pooled fluid from oropharyngeal (OP) and nasopharyngeal (NP) swab specimens, resulting in a  
307  $\geq 5.1$  log<sub>10</sub> titer with no remaining infectious virus detectable. We additionally evaluated the  
308 tissue lysis buffer RLT using homogenised ferret lung as sample material, with treatment  
309 resulting in a  $\geq 4.8$  log<sub>10</sub> titer reduction with no residual infectious virus detectable.

310

### 311 **3.3. SARS-CoV-2 inactivation by detergents**

312 Detergents can be used to inactivate lipid enveloped viruses such as coronaviruses by  
313 disrupting the viral envelope, therefore rendering them unable to attach or enter cells (24–27).  
314 Here, we evaluated Triton X-100, SDS, NP40 and Tween 20 for their ability to inactivate SARS-  
315 CoV-2. SDS treatment at 0.1% or 0.5% reduced titers by  $\geq 5.7$  and  $\geq 6.5$  log<sub>10</sub> TCID50s,  
316 respectively, while both concentrations of NP40 reduced titers by  $\geq 6.5$  log<sub>10</sub> TCID50 with no

317 residual virus detectable following NP40 treatment. In contrast, up to 0.5% Tween 20 had no  
318 effect on viral titers. Triton X-100 is commonly used in viral inactivation reagents, and here we  
319 show that at both 0.1% and 0.5% v/v concentration, virus titers in tissue culture fluid were  
320 reduced by  $\geq 4.9$  log<sub>10</sub> TCID<sub>50</sub>s, even with less than 2 min contact time (Table 4). Furthermore,  
321 we were unable to recover infectious virus from samples treated with 0.5% Triton X-100 for 10  
322 mins or longer. We also saw effective inactivation of SARS-CoV-2 by SDS, NP40 and Triton X-  
323 100 in spiked NP and OP swab specimen fluid, but, importantly, we were not able to replicate  
324 this in spiked serum; 1% Triton X-100 only reduced titers in human serum by a maximum of 2  
325 log<sub>10</sub> TCID<sub>50</sub>s with contact times of up to two hours.

326 In addition to evaluating inactivation efficacy by detergents, we assessed the effects of  
327 treatment on RNA integrity to determine their suitability for inactivation prior to nucleic acid  
328 testing. Extracted RNA from treated samples was tested using a SARS-CoV-2-specific qRT-  
329 PCR, and the Ct difference between detergent-treated samples and mock-treated controls  
330 determined (Table 4). A time-dependent increase in Ct value following treatment with 0.5%  
331 Triton X-100 was observed, indicating a detrimental effect on RNA stability with increasing  
332 treatment times. Treatment with NP40 had a marked effect, with a 30 minute treatment leading  
333 to an increase in 9-10 Cts. While we saw no increase in Ct in tissue culture fluid samples treated  
334 with 0.5% SDS, we observed an increase in Ct for SDS-treated swab fluid samples, likely due to  
335 an increased concentration of RNases in clinical samples.

336

#### 337 **3.4. SARS-CoV-2 inactivation by other chemical treatments**

338 Fixation and inactivation of viruses by addition of formaldehyde, or a combination of  
339 formaldehyde and glutaraldehyde, is a well-established protocol, particularly for diagnostic



340 electron microscopy (28, 29). 4% or 2% formaldehyde treatment for 15 or 60 mins reduced virus  
341 titers by  $\geq 4.8$  log<sub>10</sub> TCID<sub>50</sub>s when evaluated against a tissue culture fluid matrix, with no  
342 remaining infectious virus detectable (Table 5). When infected monolayers were subjected to the  
343 same treatment protocol, titer reductions were all  $\geq 6.8$  log<sub>10</sub> TCID<sub>50</sub>s, with 60 min contact time  
344 moderately more effective than 15 min. However, in this format, a 60 min 4% formaldehyde  
345 treatment was the only one from which no infectious virus was detectable. A mixture of 2%  
346 formaldehyde with 1.5% glutaraldehyde tested on infected monolayers reduced virus titers by  
347  $\geq 6.7$  log<sub>10</sub> TCID<sub>50</sub>s with no remaining infectious virus detectable for both a 15 and 60 min  
348 contact time. Polyhexanide biguanide (PHMB) is a polymer used as a disinfectant and antiseptic,  
349 evaluated here as a potential lysis buffer, but it was only able to reduce viral titers by 1.6 log<sub>10</sub>  
350 TCID<sub>50</sub>s at the highest concentration tested (2%).

351

352 **4. Discussion**

353 Samples containing infectious SARS-CoV-2 require an initial inactivation step before  
354 downstream processing; given the rapid emergence of SARS-CoV-2, these inactivation protocols  
355 have been guided by existing data for other coronaviruses and there is an urgent need to both  
356 confirm these historical data using the new virus and to validate new approaches for inactivating  
357 SARS-CoV-2. We therefore analysed numerous commercially and commonly available reagents  
358 used by public health agencies and research laboratories around the world in their response to the  
359 pandemic. In addition, to address challenges of reagent cytotoxicity in inactivation evaluation,  
360 we provide data on the effectiveness of filtration methods for removing cytotoxicity from  
361 chemically treated samples.

362 Knowledge of the expected amount of infectious virus in clinical samples obtained from  
363 COVID-19 patients is important when applying viral inactivation study data to diagnostic sample  
364 processing, allowing end users to interpret whether material they are handling is likely to  
365 represent an infectious risk to themselves and others. These values are dependent on several  
366 factors, including time post symptom onset, duration of symptoms, time elapsed between  
367 sampling and testing, the presence of neutralizing antibody responses, and immunocompetency  
368 of the individual (30). Data regarding quantitative infectious viral levels in typical clinical  
369 specimens are minimal, with most studies reporting viral loads determined by qRT-PCR only  
370 (31–33). One study of 90 qRT-PCR positive NP or endotracheal (ETT) samples from COVID-19  
371 patients estimated the median titer at 3.3 log<sub>10</sub> TCID<sub>50</sub>/mL (30). Given we demonstrate >4 log<sub>10</sub>  
372 reduction in titer for all specimen transport reagents, this suggests that these reagents may  
373 considerably decrease, even eliminate, the infectivity of a clinical sample. However, our  
374 observation that residual virus could be recovered from most treated samples indicates that these

375 media cannot be assumed to completely inactivate SARS-CoV-2 in samples and that additional  
376 precautionary measures should be taken in laboratories when it comes to sample handling and  
377 transport.

378         Limited SARS-CoV-2 inactivation data on molecular extraction reagents used in nucleic  
379 acid detection assays are currently available. One study reported that Buffer AVL either alone or  
380 in combination with ethanol was not effective at completely inactivating SARS-CoV-2 (15). By  
381 contrast, we could not recover any infectious virus from samples treated with AVL plus ethanol,  
382 consistent with previous studies indicating that AVL and ethanol in combination is effective at  
383 inactivating MERS and other enveloped viruses (10, 34), and indicating that both AVL and  
384 ethanol steps of manual extraction procedures should be performed before removal of samples  
385 from primary containment for additional assurance. Our detergent inactivation data, indicating  
386 that SDS, Triton X-100 and NP40, but not Tween 20, can effectively inactivate SARS-CoV-2 in  
387 tissue culture fluid and in pooled NP and OP swab fluid, corroborate findings of a recent study  
388 (17); however, as has been demonstrated for other viruses (31), we observed an inhibitory effect  
389 of serum on virus inactivation by detergent, highlighting the importance of validating  
390 inactivation methods with different sample types.

391         Based on our findings comparing filtration matrices, we found that the optimum method  
392 for reagent removal for inactivation studies is determined by evaluating three factors: (i)  
393 effectiveness of cytotoxicity removal; (ii) efficiency of virus recovery; and (iii) the ease of  
394 performing these methods within a containment space. Methods permitting complete removal of  
395 cytotoxic reagent components with no or little effect on virus recovery give assurance that low  
396 levels of residual virus, if present, could be detected in virus inactivation studies. During reagent  
397 testing, there were several instances where we noted residual cytotoxicity in the neat eluate

398 contrary to what was expected based on the initial reagent removal data and is likely due to the  
399 extended incubation period required for inactivation testing (up to 7 days, compared with  
400 overnight for cytotoxicity evaluation). In all cases however, we were still able to enhance the  
401 levels of titer reduction detectable when compared with what would have been achieved by  
402 sample dilution alone.

403 In conclusion, we have evaluated methods for straightforward, rapid determination of  
404 purification options for any reagent prior to inactivation testing, enabling establishment of  
405 effective methods for sample purification while minimising virus loss. This is applicable to  
406 inactivation studies for all viruses (known and novel), not only SARS-CoV-2. We have applied  
407 these methods to obtain SARS-CoV-2 inactivation data for a wide range of reagents in use (or  
408 proposed for use) in SARS-CoV-2 diagnostic and research laboratories. In addition to guiding  
409 laboratory risk assessments, this information enables laboratories to assess alternative reagents  
410 that may be used for virus inactivation and nucleic acid extraction, particularly considering  
411 concerns about extraction reagent availability due to increased global demand caused by the  
412 COVID-19 pandemic. Furthermore, chemical treatments evaluated here are commonly used for  
413 inactivation of a wide range of different viruses and other pathogens, and the results presented  
414 may be used to directly inform and improve the design of future inactivation studies.

415 **Acknowledgments**

416 The authors would like to thank: The Respiratory Virus Unit at PHE Colindale, and the Virology  
417 Laboratories at PHE Cambridge and PHE Bristol for donation of pooled respiratory samples; and  
418 Ayoub Saei at the Statistics Unit, PHE Colindale for statistical advice.

419

420 The views expressed in this article are those of the author(s) and are not necessarily those of  
421 Public Health England or the Department of Health and Social Care

422

423

424 **References**

- 425 1. Coronaviridae Study Group of the International Committee on Taxonomy of Viruses.  
426 2020. The species Severe acute respiratory syndrome-related coronavirus: classifying  
427 2019-nCoV and naming it SARS-CoV-2. *Nat Microbiol* 5:536–544.
- 428 2. Huang C, Wang Y, Li X, Ren L, Zhao J, Hu Y, Zhang L, Fan G, Xu J, Gu X, Cheng Z, Yu  
429 T, Xia J, Wei Y, Wu W, Xie X, Yin W, Li H, Liu M, Xiao Y, Gao H, Guo L, Xie J, Wang  
430 G, Jiang R, Gao Z, Jin Q, Wang J, Cao B. 2020. Clinical features of patients infected with  
431 2019 novel coronavirus in Wuhan, China. *Lancet* 395:497–506.
- 432 3. Wu F, Zhao S, Yu B, Chen Y-M, Wang W, Song Z-G, Hu Y, Tao Z-W, Tian J-H, Pei Y-  
433 Y, Yuan M-L, Zhang Y-L, Dai F-H, Liu Y, Wang Q-M, Zheng J-J, Xu L, Holmes EC,  
434 Zhang Y-Z. 2020. A new coronavirus associated with human respiratory disease in China.  
435 *Nature* 579:265–269.
- 436 4. Public Health England. 2020. COVID-19: guidance for sampling and for diagnostic  
437 laboratoriesite.
- 438 5. World Health Organization. Laboratory biosafety guidance related to the novel  
439 coronavirus (2019-nCoV).
- 440 6. Centers for Disease Control and Prevention. Interim Guidelines for Biosafety and  
441 COVID-19.
- 442 7. Rabenau HF, Biesert L, Schmidt T, Bauer G, Cinatl J, Doerr HW. 2005. SARS-  
443 coronavirus (SARS-CoV) and the safety of a solvent/detergent (S/D) treated  
444 immunoglobulin preparation. *Biologicals* 33:95–9.
- 445 8. Rabenau HF, Kampf G, Cinatl J, Doerr HW. 2005. Efficacy of various disinfectants  
446 against SARS coronavirus. *J Hosp Infect* 61:107–111.

- 447 9. Leclercq I, Batéjat C, Burguière AM, Manuguerra J-C. 2014. Heat inactivation of the  
448 Middle East respiratory syndrome coronavirus. *Influenza Other Respi Viruses* 8:585–6.
- 449 10. Kumar M, Mazur S, Ork BL, Postnikova E, Hensley LE, Jahrling PB, Johnson R,  
450 Holbrook MR. 2015. Inactivation and safety testing of Middle East Respiratory Syndrome  
451 Coronavirus. *J Virol Methods* 223:13–18.
- 452 11. Darnell MER, Subbarao K, Feinstone SM, Taylor DR. 2004. Inactivation of the  
453 coronavirus that induces severe acute respiratory syndrome, SARS-CoV. *J Virol Methods*  
454 121:85–91.
- 455 12. Darnell MER, Taylor DR. 2006. Evaluation of inactivation methods for severe acute  
456 respiratory syndrome coronavirus in noncellular blood products. *Transfusion* 46:1770–  
457 1777.
- 458 13. Kariwa H, Fujii N, Takashima I. 2004. Inactivation of SARS coronavirus by means of  
459 povidone-iodine, physical conditions, and chemical reagents. *Jpn J Vet Res* 52:105–112.
- 460 14. Mantlo E, Evans A, Patterson-Fortin L, Boutros J, Smith R, Paessler S. 2020. Efficacy of  
461 a novel iodine complex solution, CupriDyne, in inactivating SARS-CoV-2. *bioRxiv Prepr*  
462 *Serv Biol*.
- 463 15. Pastorino B, Touret F, Gilles M, Luciani L, de Lamballerie X, Charrel RN. 2020.  
464 Evaluation of Chemical Protocols for Inactivating SARS-CoV-2 Infectious Samples.  
465 *Viruses* 12.
- 466 16. Bidra AS, Pelletier JS, Westover JB, Frank S, Brown SM, Tessema B. 2020. Rapid In-  
467 Vitro Inactivation of Severe Acute Respiratory Syndrome Coronavirus 2 (SARS-CoV-2)  
468 Using Povidone-Iodine Oral Antiseptic Rinse. *J Prosthodont Off J Am Coll Prosthodont*.
- 469 17. Patterson EI, Prince T, Anderson ER, Casas-Sanchez A, Smith SL, Cansado-Utrilla C,

- 470 Turtle L, Hughes GL. 2020. Methods of inactivation of SARS-CoV-2 for downstream  
471 biological assays. *bioRxiv Prepr Serv Biol*.
- 472 18. Bain W, Lee JS, Watson AM, Stitt-Fischer MS. 2020. Practical Guidelines for Collection,  
473 Manipulation and Inactivation of SARS-CoV-2 and COVID-19 Clinical Specimens. *Curr*  
474 *Protoc Cytom* 93:e77.
- 475 19. Jureka AS, Silvas JA, Basler CF. 2020. Propagation, Inactivation, and Safety Testing of  
476 SARS-CoV-2. *Viruses* 12.
- 477 20. Spearman Cjbj. 1908. The method of right and wrong cases (constant stimuli) without  
478 Gauss's formulae. *Br J Psychol* 2:227.
- 479 21. Kärber G. 1931. Beitrag zur kollektiven Behandlung pharmakologischer Reihenversuche.  
480 *Naunyn Schmiedebergs Arch Exp Pathol Pharmacol* 162:480–483.
- 481 22. British Standards Institution. 2019. Chemical disinfectants and antiseptics. Quantitative  
482 suspension test for the evaluation of virucidal activity in the medical area. Test method  
483 and requirements (Phase 2/Step 1).
- 484 23. Corman VM, Landt O, Kaiser M, Molenkamp R, Meijer A, Chu DK, Bleicker T, Brünink  
485 S, Schneider J, Schmidt ML, Mulders DG, Haagmans BL, van der Veer B, van den Brink  
486 S, Wijsman L, Goderski G, Romette J-L, Ellis J, Zambon M, Peiris M, Goossens H,  
487 Reusken C, Koopmans MP, Drosten C. 2020. Detection of 2019 novel coronavirus (2019-  
488 nCoV) by real-time RT-PCR. *Euro Surveill* 25.
- 489 24. Tempestilli M, Pucci L, Notari S, Di Caro A, Castilletti C, Rivelli MR, Agrati C, Pucillo  
490 LP. 2015. Diagnostic performances of clinical laboratory tests using Triton X-100 to  
491 reduce the biohazard associated with routine testing of Ebola virus-infected patients. *Clin*  
492 *Chem Lab Med* 53:1967–73.



- 493 25. Krebs FC, Miller SR, Malamud D, Howett MK, Wigdahl B. 1999. Inactivation of human  
494 immunodeficiency virus type 1 by nonoxynol-9, C31G, or an alkyl sulfate, sodium  
495 dodecyl sulfate. *Antiviral Res* 43:157–73.
- 496 26. Remy MM, Alfter M, Chiem M-N, Barbani MT, Engler OB, Suter-Riniker F. 2019.  
497 Effective chemical virus inactivation of patient serum compatible with accurate  
498 serodiagnosis of infections. *Clin Microbiol Infect* 25:907.e7-907.e12.
- 499 27. Kawahara T, Akiba I, Sakou M, Sakaguchi T, Taniguchi H. 2018. Inactivation of human  
500 and avian influenza viruses by potassium oleate of natural soap component through  
501 exothermic interaction. *PLoS One* 13:e0204908.
- 502 28. Hazelton PR, Gelderblom HR. 2003. Electron microscopy for rapid diagnosis of infectious  
503 agents in emergent situations. *Emerg Infect Dis* 9:294–303.
- 504 29. Möller L, Schünadel L, Nitsche A, Schwebke I, Hanisch M, Laue M. 2015. Evaluation of  
505 virus inactivation by formaldehyde to enhance biosafety of diagnostic electron  
506 microscopy. *Viruses* 7:666–79.
- 507 30. Bullard J, Dust K, Funk D, Strong JE, Alexander D, Garnett L, Boodman C, Bello A,  
508 Hedley A, Schiffman Z, Doan K, Bastien N, Li Y, Van Caesele PG, Poliquin G. 2020.  
509 Predicting infectious SARS-CoV-2 from diagnostic samples. *Clin Infect Dis*.
- 510 31. van Kampen JJA, Tintu A, Russcher H, Fraaij PLA, Reusken CBEM, Rijken M, van  
511 Hellemond JJ, van Genderen PJJ, Koelewijn R, de Jong MD, Haddock E, Fischer RJ,  
512 Munster VJ, Koopmans MPG. 2017. Ebola Virus Inactivation by Detergents Is Annulled  
513 in Serum. *J Infect Dis* 216:859–866.
- 514 32. To KK-W, Tsang OT-Y, Leung W-S, Tam AR, Wu T-C, Lung DC, Yip CC-Y, Cai J-P,  
515 Chan JM-C, Chik TS-H, Lau DP-L, Choi CY-C, Chen L-L, Chan W-M, Chan K-H, Ip JD,

- 516 Ng AC-K, Poon RW-S, Luo C-T, Cheng VC-C, Chan JF-W, Hung IF-N, Chen Z, Chen H,  
517 Yuen K-Y. 2020. Temporal profiles of viral load in posterior oropharyngeal saliva  
518 samples and serum antibody responses during infection by SARS-CoV-2: an observational  
519 cohort study. *Lancet Infect Dis* 20:565–574.
- 520 33. Wölfel R, Corman VM, Guggemos W, Seilmaier M, Zange S, Müller MA, Niemeyer D,  
521 Jones TC, Vollmar P, Rothe C, Hoelscher M, Bleicker T, Brünink S, Schneider J, Ehmann  
522 R, Zwirgmaier K, Drosten C, Wendtner C. 2020. Virological assessment of hospitalized  
523 patients with COVID-2019. *Nature* 581:465–469.
- 524 34. Smither SJ, Weller SA, Phelps A, Eastaugh L, Ngugi S, O’Brien LM, Steward J, Lonsdale  
525 SG, Lever MS. 2015. Buffer AVL Alone Does Not Inactivate Ebola Virus in a  
526 Representative Clinical Sample Type. *J Clin Microbiol* 53:3148–3154.
- 527

528 **Table 1: Purification of reagents: Values [95% CI] represent the dilution factor required after one purification process to**  
 529 **achieve the CC20 concentration [95% CI].**

| Type                            | Reagent                       | Reagent:media ratio or %v/v | Post-filtration dilution factor of eluate needed for CC20 |                     |                     |                     |                     |                    |
|---------------------------------|-------------------------------|-----------------------------|-----------------------------------------------------------|---------------------|---------------------|---------------------|---------------------|--------------------|
|                                 |                               |                             | Unpurified                                                | Sephadex LH-20      | Sephacryl S400HR    | Amicon Ultra 50kDa  | Pierce DRSC         | Bio-Beads SM2      |
| Specimen Transport Tube Reagent | BioComma                      | 10:1                        | 36.2 [30.1 – 44.0]                                        | <2 [n/a]            | <2 [n/a]            | <1 [n/a]            | <1 [n/a]            | 12.1 [9.2 – 16.4]  |
|                                 | Sigma MM                      | 1.5:1                       | 417 [306 – 619]                                           | 59.2 [51.8 – 67.1]  | 48.7 [44.6 – 53.3]  | 4.0 [3.6 – 4.3]     | <1 [n/a]            | 7.6 [6.5 – 8.9]    |
|                                 | eNAT                          | 3:1                         | 70.1 [55.0 – 88.5]                                        | <1 [n/a]            | 2.8 [2.5 – 3.1]     | <1 [n/a]            | <1 [n/a]            | 24.4 [20.2 – 30.2] |
|                                 | Primestore MTM                | 3:1                         | 56.2 [47.2 – 66.3]                                        | <1 [n/a]            | 4.8 [nc]            | <1 [n/a]            | <1 [n/a]            | 18.3 [15.4 – 22.1] |
|                                 | Cobas PCR Media               | 1:1                         | 55.5 [46.5 – 67.5]                                        | 2.7 [2.3 – 3.1]     | 5.2 [4.6 – 5.9]     | <1 [n/a]            | <1 [n/a]            | 26.5 [23.5 – 30.2] |
|                                 | DNA/RNA Shield                | 10:1                        | 1098 [994 – 1231]                                         | 1155 [1076 – 1253]  | 82.3 [<82.3 – 94.7] | 29.6 [26.2 – 32.3]  | 66.1 [58.1 – 75.8]  | 7.1 [5.5 – 8.6]    |
|                                 | 40% GHCl/Tx TM                | 10:1                        | 245 [205 – 288]                                           | 24.5 [<24.5 – 31.5] | 25.9 [<25.9 – 36.7] | 13.3 [<13.3 – 15.6] | 2.2 [nc]            | 119 [103 – 135]    |
|                                 | 2M GITC/Tx TM                 | 10:1                        | 245 [215 – 277]                                           | 19.4 [<19.4 – 23.9] | 19.1 [15.4 – 26.3]  | 37.8 [nc]           | <1 [n/a]            | 127 [113 – 141]    |
| Molecular Extraction Reagents   | 4M GITC/Tx TM                 | 10:1                        | 1054 [889 – 1262]                                         | 545 [487 – 613]     | 141 [102 – 201]     | 211 [172 – 247]     | 3.5 [3.1 – 3.9]     | 20.3 [15.2 – 27.9] |
|                                 | Buffer AVL                    | 4:1                         | 61.6 [50.8 – 75.1]                                        | <1 [n/a]            | 3.2 [2.9 – 3.5]     | <1 [n/a]            | <1 [n/a]            | 26.1 [21.5 – 32.3] |
|                                 | MagNA Pure LB                 | 1:1                         | 1934 [1348 – 2780]                                        | 1391 [<1391–1654]   | 474 [434 – 517]     | 346 [<346 – 382]    | 59.1 [45.6 – 70.4]  | 5.8 [1.4 – 7.8]    |
|                                 | NucliSENS                     | 1:1                         | 60.5 [54.9 – 66.2]                                        | <1 [n/a]            | 4.3 [4.0 – 4.9]     | <1 [n/a]            | <1 [n/a]            | 4.6 [4.6 – 6.7]    |
|                                 | Panther Fusion                | 1.42:1                      | 196 [<196 – 214]                                          | <1 [n/a]            | 18.0 [<18.0 – 19.4] | 15.9 [<15.9 – 16.5] | <1 [n/a]            | <1 [n/a]           |
|                                 | Buffer AL                     | 1:1                         | 61.9 [56.7 – 65.4]                                        | 37.4 [34.7 – 41.1]  | 7.8 [6.6 – 9.3]     | 30.5 [25.5 – 36.3]  | 29.5 [25.9 – 33.9]  | 16.5 [14.6 – 18.9] |
|                                 | Cobas Omni LYS                | 1:1                         | 225 [<225 – 255]                                          | 142 [nc]            | 45.8 [<45.8 – 55.6] | 117 [nc]            | 16.7 [nc]           | 6.7 [2.9 – 8.7]    |
|                                 | PHE in-house LB               | 4:1                         | 231 [<231 – 310]                                          | 26.2 [22.0 – 31.8]  | 11.4 [9.9 – 13.2]   | 2.7 [<2.7 – 4.9]    | <1 [n/a]            | 12.9 [9.8 – 17.9]  |
|                                 | NeuMoDx LB                    | 1:1                         | 30.2 [24.1 – 37.9]                                        | 8.0 [7.3 – 8.8]     | 2.0 [1.7 – 2.4]     | 7.5 [6.6 – 8.1]     | 4.2 [0.4 – 6.9]     | 6.8 [<6.8 – 8.4]   |
|                                 | E&O Labs VPSS                 | 10:1                        | 174 [145 – 206]                                           | 24.9 [22.1 – 28.4]  | 14.2 [11.7 – 17.5]  | 7.7 [<7.7 – 14.5]   | <1 [n/a]            | 11.7 [8.5 – 16.4]  |
| Detergents                      | E&O Lab LB                    | 10:1                        | 69.0 [62.7 – 76.9]                                        | 9.5 [<9.5 – 11.0]   | 8.0 [7.4 – 8.7]     | 2.2 [nc]            | <1 [n/a]            | 4.1 [3.5 – 4.7]    |
|                                 | Samba SCoV LB                 | 10:1                        | 177 [<177 – 213]                                          | 68.2 [63.0 – 75.4]  | 27.3[24.2 – 30.1]   | 5.2 [<5.2 – 6.0]    | <1 [n/a]            | 1.5 [1.0 – 1.8]    |
|                                 | Buffer RLT                    | 9:1                         | 48.0 [40.3 – 58.0]                                        | 2.9 [2.3 – 4.3]     | <1 [n/a]            | <1 [n/a]            | <1 [n/a]            | 18.5 [15.3 – 22.8] |
|                                 | Triton-X100                   | 1%                          | 185 [<185 – 211]                                          | 48.4 [<48.4 – 58.4] | ~17.22 [nc]         | <1 [n/a]            | <1 [n/a]            | <1 [n/a]           |
|                                 | Tween 20                      | 1%                          | 7.7 [6.9 – 8.6]                                           | 4.2 [<3.8 – 4.9]    | 1.3 [1.0 – 1.7]     | 4.4 [4.0 – 5.1]     | 4.9 [3.4 – 7.5]     | <1 [n/a]           |
| Other                           | SDS                           | 1%                          | 69.6 [n/a]                                                | <1 [n/a]            | <1 [n/a]            | <1 [n/a]            | <1 [n/a]            | <1 [n/a]           |
|                                 | NP40                          | 1%                          | 320 [<320 – 402]                                          | 171 [<171 – 196]    | 140 [123 – 161]     | <1 [n/a]            | <1 [n/a]            | <1 [n/a]           |
|                                 | Formaldehyde                  | 4%                          | 4207 [3270 – 5844]                                        | 288 [226 – 383]     | 111 [93 – 136]      | <1 [n/a]            | 51.6 [<51.6 – 65.9] | 1309 [1058 – 1685] |
|                                 | Formaldehyde + Glutaraldehyde | 2% + 1.5%                   | 4227 [3183 – 6027]                                        | 39.8 [32.7 – 51.4]  | 97.9 [82.9 – 118]   | <1 [n/a]            | 22.6 [<22.6 – 27.2] | 1545 [1164 – 2203] |
|                                 | Ethanol                       | 100%                        | 63.3 [27.6 – 103]                                         | <1 [n/a]            | <1 [n/a]            | <1 [n/a]            | <1 [n/a]            | 8.8 [6.5 – 12.5]   |
|                                 | Methanol                      | 100%                        | 108 [79.5 – 155]                                          | <1 [n/a]            | <1 [n/a]            | <1 [n/a]            | <1 [n/a]            | 2.2 [1.9 – 2.5]    |
|                                 | 0.1% PHMB                     | 10:1                        | 30.1 [26.6 – 34.2]                                        | 9.5 [8.9 – 10.2]    | <1 [n/a]            | <1 [n/a]            | <1 [n/a]            | 9.8 [<9.8 – 11.8]  |
| 1.0% PHMB                       | 10:1                          | 328 [304 – 356]             | 132 [111 – 154]                                           | <1 [n/a]            | <1 [n/a]            | 9.3 [<9.3 – 11.1]   | 203 [<203 – 299]    |                    |
| 2.0% PHMB                       | 10:1                          | 837 [<837– 1141]            | 240 [198 – 282]                                           | 4.1 [3.7 – 4.5]     | <1 [n/a]            | 25.0 [<20.9 – 29.0] | 479 [<479 – 647]    |                    |

LB – lysis buffer; TM – transport Medium; nc – not able to be calculated.

530  
531

532 **Table 2: Virus inactivation by specimen transport tube reagents**

| Reagent                                               | Virus matrix         | Reagent: virus ratio | Contact time (mins) | Titer reduction Log10 ( $\pm$ SE) | Virus detectable in titration <sup>†</sup> (#replicates) | Virus detectable in culture (#replicates) |
|-------------------------------------------------------|----------------------|----------------------|---------------------|-----------------------------------|----------------------------------------------------------|-------------------------------------------|
| Sigma MM                                              | Tissue culture fluid | 1.5:1                | 10                  | $\geq 4.8$ ( $\pm 0.1$ )          | Yes (2/3) <sup>φ</sup>                                   | Yes (1/3)                                 |
|                                                       |                      |                      | 30                  | $\geq 4.8$ ( $\pm 0.1$ )          | Yes (1/3) <sup>φ</sup>                                   | Yes (1/3)                                 |
|                                                       |                      |                      | 60                  | $\geq 4.8$ ( $\pm 0.1$ )          | No (0/3) <sup>φ</sup>                                    | No (0/3)                                  |
| eNAT                                                  | Tissue culture fluid | 1:3                  | 10                  | 4.8 ( $\pm 0.2$ )                 | Yes (3/3)                                                | Yes (3/3)                                 |
|                                                       |                      |                      | 30                  | 5.1 ( $\pm 0.2$ )                 | Yes (3/3)                                                | Yes (3/3)                                 |
|                                                       |                      |                      | 60                  | 5.2 ( $\pm 0.2$ )                 | Yes (3/3)                                                | Yes (3/3)                                 |
|                                                       |                      | 3:1                  | 10                  | $\geq 5.1$ ( $\pm 0.1$ )          | No (0/3)*                                                | Yes (1/3)                                 |
|                                                       |                      |                      | 30                  | $\geq 5.1$ ( $\pm 0.1$ )          | No (0/3)*                                                | Yes (1/3)                                 |
|                                                       |                      |                      | 60                  | $\geq 5.1$ ( $\pm 0.1$ )          | No (0/3)*                                                | No (0/3)                                  |
| Primestore MTM                                        | Tissue culture fluid | 1:3                  | 10                  | $\geq 5.1$ ( $\pm 0.2$ )          | No (0/3)*                                                | No (0/3)                                  |
|                                                       |                      |                      | 30                  | $\geq 5.1$ ( $\pm 0.2$ )          | No (0/3)*                                                | No (0/3)                                  |
| Cobas PCR Media                                       | Tissue culture fluid | 1:1.4                | 10                  | 4.6 ( $\pm 0.1$ )                 | Yes (3/3)                                                | Yes (3/3)                                 |
|                                                       |                      |                      | 30                  | 4.8 ( $\pm 0.1$ )                 | Yes (3/3)                                                | Yes (3/3)                                 |
|                                                       |                      |                      | 60                  | 4.8 ( $\pm 0.1$ )                 | Yes (3/3)                                                | Yes (3/3)                                 |
| Aptima Specimen Transport Medium                      | Tissue culture fluid | 5.8:1                | 10                  | $\geq 4.4$ ( $\pm 0.1$ )          | Yes (1/3)                                                | No (0/3)                                  |
|                                                       |                      |                      | 30                  | $\geq 4.4$ ( $\pm 0.1$ )          | No (0/3)                                                 | No (0/3)                                  |
| Virus Transport and Preservation Medium (Inactivated) | Tissue culture fluid | 10:1                 | 60                  | $\geq 4.4$ ( $\pm 0.1$ )          | Yes (2/3)                                                | Yes (1/3)                                 |
|                                                       |                      |                      | 10                  | 5.0 ( $\pm 0.2$ )                 | Yes (3/3)                                                | Yes (3/3)                                 |
| DNA/RNA Shield                                        | Tissue culture fluid | 10:1                 | 30                  | 4.9 ( $\pm 0.2$ )                 | Yes (3/3)                                                | Yes (3/3)                                 |
|                                                       |                      |                      | 60                  | 4.8 ( $\pm 0.2$ )                 | Yes (3/3)                                                | Yes (3/3)                                 |
|                                                       |                      |                      | 10                  | $\geq 4.8$ ( $\pm 0.2$ )          | No (0/3)**                                               | tbc                                       |
| 2M GITC                                               | Tissue culture fluid | 10:1                 | 30                  | $\geq 4.8$ ( $\pm 0.2$ )          | No (0/3)**                                               | tbc                                       |
|                                                       |                      |                      | 60                  | $\geq 4.8$ ( $\pm 0.2$ )          | No (0/3)**                                               | tbc                                       |
| 4M GITC                                               | Tissue culture fluid | 10:1                 | 30                  | $\geq 4.6$ ( $\pm 0.1$ )          | No (0/3)*                                                | Yes (1/3)                                 |
| 40% GHCl                                              | Tissue culture fluid | 10:1                 | 30                  | $\geq 5.1$ ( $\pm 0.2$ )          | No (0/3)*                                                | No (0/3)                                  |
|                                                       |                      |                      | 30                  | $\geq 4.6$ ( $\pm 0.1$ )          | Yes (1/3)*                                               | Yes (3/3)                                 |

533  
534  
535  
536

<sup>†</sup> - samples titrated by TCID50, with a limit of detection of 5 TCID50/mL (0.7 Log10 TCID50/mL) unless stated  
\* - limit of detection was 50 TCID50/mL (1.7 Log10 TCID50/mL) due to cytotoxicity in neat wells of TCID50 assay  
\*\* - limit of detection was 504 TCID50/mL (2.7 Log10 TCID50/mL) due to cytotoxicity in neat and -1 wells of TCID50 assay  
φ - titration by plaque assay; limit of detection was 3.3 PFU/mL (0.5 Log10 PFU/mL)

537 **Table 3: Virus inactivation by molecular extraction reagents**

| Reagent                                | Virus matrix              | Reagent:<br>virus ratio          | Contact<br>time<br>(mins) | Titer<br>reduction<br>Log10 (±SE) | Virus detectable in<br>titration <sup>†</sup><br>(#replicates) | Virus detectable in<br>culture<br>(#replicates) |
|----------------------------------------|---------------------------|----------------------------------|---------------------------|-----------------------------------|----------------------------------------------------------------|-------------------------------------------------|
| AVL                                    | Tissue culture fluid      | 4:1                              | 10                        | 5.1 (± 0.1)                       | Yes (3/3)                                                      | Yes (3/3)                                       |
| AVL + Ethanol                          | Tissue culture fluid      | 4:1:4<br>(AVL:virus:<br>ethanol) | 10 <sup>φ</sup>           | ≥ 5.9 (± 0.2)                     | No (0/3)                                                       | No (0/3)                                        |
| RLT (+BME)                             | Ferret lung<br>homogenate | 9:1                              | 10                        | ≥ 4.9 (± 0.2)                     | No (0/3)*                                                      | No (0/3)                                        |
| MagNA Pure External<br>LB              | Tissue culture fluid      | 1:1                              | 10                        | ≥ 4.4 (± 0.2)                     | No (0/3)*                                                      | No (0/3)                                        |
| AL                                     | Tissue culture fluid      | 1:1                              | 10                        | ≥ 3.5 (± 0.2)                     | No (0/3)**                                                     | No (0/3)                                        |
| Cobas Omni LYS                         | Tissue culture fluid      | 1:1                              | 10                        | ≥ 3.9 (± 0.1)                     | No (0/3)**                                                     | No (0/3)                                        |
| PHE in-house LB                        | Tissue culture fluid      | 4:1                              | 10                        | ≥ 5.6 (± 0.1)                     | Yes (1/3)*                                                     | Yes (2/3)                                       |
| VPSS (E&O)                             | Tissue culture fluid      | 10:1                             | 30                        | ≥ 5.2 (± 0.2)                     | No (0/3)*                                                      | Yes (2/3)                                       |
|                                        |                           | 1:1                              | 10                        | ≥ 5.1 (± 0.1)                     | No (0/3)*                                                      | Yes (1/3)                                       |
| Lysis Buffer (E&O)                     | Tissue culture fluid      | 1:1                              | 10                        | ≥ 5.1 (± 0.1)                     | No (0/3)*                                                      | No (0/3)                                        |
| NeuMoDx Lysis<br>Buffer                | Tissue culture fluid      | 1:1                              | 10                        | 4.3 (± 0.2)                       | Yes (3/3)*                                                     | Yes (3/3)                                       |
| Samba SCoV LB                          | Tissue culture fluid      | 1:1                              | 10                        | 4.8 (± 0.1)                       | Yes (3/3)                                                      | Yes (3/3)                                       |
| NucliSENS LB                           | Tissue culture fluid      | 1:1                              | 10                        | ≥ 5.0 (± 0.1)                     | Yes (2/3) <sup>φ</sup>                                         | Yes (1/3)                                       |
|                                        |                           |                                  | 30                        | ≥ 5.1 (± 0.0)                     | No (0/3) <sup>φ</sup>                                          | Yes (1/3)                                       |
|                                        |                           | 2:1                              | 10                        | ≥ 4.9 (± 0.1)                     | No (0/3)*                                                      | No (0/3)                                        |
|                                        |                           |                                  | 10                        | ≥ 4.4 (± 0.0)                     | No (0/3) <sup>φ</sup>                                          | No (0/3)                                        |
| Panther Fusion<br>Specimen Lysis Tubes | Tissue culture fluid      | 1.42:1                           | 30                        | ≥ 4.4 (± 0.0)                     | No (0/3) <sup>φ</sup>                                          | Yes (1/3)                                       |
|                                        |                           |                                  | 60                        | ≥ 4.4 (± 0.0)                     | No (0/3) <sup>φ</sup>                                          | Yes (1/3)                                       |
|                                        |                           |                                  | Pooled swab material      | 30                                | ≥ 5.1 (± 0.1)                                                  | No (0/3)                                        |

538 LB – Lysis buffer

539 † - samples titrated by TCID50, with a limit of detection of 5 TCID50/mL (0.7 Log10 TCID50/mL) unless stated

540 \* - limit of detection was 50 TCID50/mL (1.7 Log10 TCID50/mL) due to cytotoxicity in neat wells of TCID50 assay

541 \*\* - limit of detection was 504 TCID50/mL (2.7 Log10 TCID50/mL) due to cytotoxicity in neat and -1 wells of TCID50 assay

542 φ - titration by plaque assay; limit of detection was 3.3 PFU/mL (0.5 Log10 PFU/mL)

543 **Table 4: Virus inactivation by detergents**

| Detergent            | Virus matrix         | Detergent: virus ratio | Contact time (mins)     | Titer reduction Log10 ( $\pm$ SE) | Virus detectable in TCID50 <sup>†</sup> (#replicates) | Virus detectable in culture (#replicates) | RNA integrity <sup>‡</sup> (Ct) |
|----------------------|----------------------|------------------------|-------------------------|-----------------------------------|-------------------------------------------------------|-------------------------------------------|---------------------------------|
| Tween 20             | Tissue culture fluid | 0.1% v/v               | 30                      | 0.0 ( $\pm$ 0.2)                  | Yes (3/3)                                             | Yes (3/3)                                 | n.d.                            |
|                      |                      | 0.5% v/v               | 30                      | 0.0 ( $\pm$ 0.2)                  | Yes (3/3)                                             | Yes (3/3)                                 | +0.2 ( $\pm$ 0.0)               |
|                      |                      | 0.1% v/v               | 30                      | $\geq$ 4.9 ( $\pm$ 0.1)           | Yes (3/3)                                             | Yes (3/3)                                 | n.d.                            |
| Triton X-100         | Tissue culture fluid |                        | <2                      | 5.9 ( $\pm$ 0.2)                  | Yes (3/3)                                             | Yes (3/3)                                 | +0.1 ( $\pm$ 0.2)               |
|                      |                      | 0.5% v/v               | 10                      | $\geq$ 6.2 ( $\pm$ 0.2)           | No (0/3)                                              | No (0/3)                                  | +1.4 ( $\pm$ 0.1)               |
|                      |                      |                        | 30                      | $\geq$ 6.1 ( $\pm$ 0.2)           | No (0/3)                                              | No (0/3)                                  | +3.6 ( $\pm$ 0.1)               |
|                      | Human sera           | 1.0% v/v               | 30                      | 1.3 ( $\pm$ 0.2)                  | Yes (3/3)                                             | Yes (3/3)                                 | n.d.                            |
|                      |                      |                        | 60                      | 1.5 ( $\pm$ 0.2)                  | Yes (3/3)                                             | Yes (3/3)                                 | n.d.                            |
|                      |                      |                        | 120                     | 2.0 ( $\pm$ 0.2)                  | Yes (3/3)                                             | Yes (3/3)                                 | n.d.                            |
| Pooled swab material | 0.5% v/v             | 30                     | $\geq$ 6.1 ( $\pm$ 0.2) | No (0/3)                          | tbc                                                   | +8.3 ( $\pm$ 0.2)                         |                                 |
| SDS                  | Tissue culture fluid | 0.1% v/v               | 30                      | 5.7 ( $\pm$ 0.1)                  | Yes (3/3)                                             | Yes (3/3)                                 | +1.3 ( $\pm$ 0.2)               |
|                      |                      | 0.5% v/v               | 30                      | $\geq$ 6.5 ( $\pm$ 0.1)           | Yes (1/3)                                             | Yes (2/3)                                 | -0.6 ( $\pm$ 0.2)               |
|                      | Pooled swab material | 1.0% v/v               | 30                      | 5.7 ( $\pm$ 0.2)                  | Yes (3/3)                                             | tbc                                       | +6.1 ( $\pm$ 0.0)               |
| NP40                 | Tissue culture fluid | 0.1% v/v               | 30                      | $\geq$ 6.5 ( $\pm$ 0.1)           | No (0/3)                                              | No (0/3)                                  | +9.0 ( $\pm$ 0.2)               |
|                      |                      | 0.5% v/v               | 30                      | $\geq$ 6.5 ( $\pm$ 0.1)           | No (0/3)                                              | No (0/3)                                  | +10.3 ( $\pm$ 0.1)              |
|                      | Pooled swab material | 0.5% v/v               | 30                      | $\geq$ 6.1 ( $\pm$ 0.2)           | No (0/3)                                              | tbc                                       | +8.7 ( $\pm$ 0.1)               |

544  
545  
546  
547

n.d. - not done

<sup>†</sup> - limit of detection in TCID50 assay was 5 TCID50/mL (0.7 Log10 TCID50/mL)

<sup>‡</sup> - difference in Ct in SARS-CoV-specific real-time RT-PCR compared to PBS-treated control,  $\pm$  standard error

548 **Table 5: Other reagent types**

| Reagent                          | Virus matrix         | Reagent:<br>virus ratio | Contact<br>time (mins) | Titer reduction<br>Log10<br>(±SE) | Virus detectable<br>in TCID50 <sup>†</sup><br>(#replicates) | Virus detectable<br>in culture<br>(#replicates) |           |
|----------------------------------|----------------------|-------------------------|------------------------|-----------------------------------|-------------------------------------------------------------|-------------------------------------------------|-----------|
| Formaldehyde                     | Tissue culture fluid | 4%                      | 15                     | ≥ 4.8 (± 0.2)                     | No (0/3)                                                    | No (0/3)                                        |           |
|                                  |                      |                         | 60                     | ≥ 5.0 (± 0.2)                     | No (0/3)                                                    | No (0/3)                                        |           |
|                                  |                      | 2%                      | 15                     | ≥ 4.8 (± 0.2)                     | No (0/3)                                                    | No (0/3)                                        |           |
|                                  |                      |                         | 60                     | ≥ 5.0 (± 0.2)                     | No (0/3)                                                    | No (0/3)                                        |           |
|                                  | Infected monolayer   | 4%                      | 15                     | ≥ 6.9 (± 0.2)                     | Yes (1/3)                                                   | Yes (1/3)                                       |           |
|                                  |                      |                         | 60                     | ≥ 7.5 (± 0.2)                     | No (0/3)                                                    | No (0/3)                                        |           |
|                                  |                      | 2%                      | 15                     | ≥ 6.8 (± 0.2)                     | Yes (2/3)                                                   | Yes (2/3)                                       |           |
|                                  |                      |                         | 60                     | ≥ 7.3 (± 0.2)                     | Yes (2/3)                                                   | Yes (3/3)                                       |           |
| Formaldehyde +<br>Glutaraldehyde | Tissue culture fluid | 2% + 1.5%               | 60                     | ≥ 5.0 (± 0.2)                     | No (0/3)                                                    | No (0/3)                                        |           |
|                                  | Infected monolayer   | 2% + 1.5%               | 15                     | ≥ 6.7 (± 0.1)                     | No (0/3)                                                    | No (0/3)                                        |           |
|                                  |                      |                         | 60                     | ≥ 6.7 (± 0.1)                     | No (0/3)                                                    | No (0/3)                                        |           |
| Methanol‡                        | Infected monolayer   | 100%                    | 15                     | ≥ 6.7 (± 0.1)                     | No (0/3)                                                    | No (0/3)                                        |           |
| PHMB                             | 0.1%                 | Tissue culture fluid    | 10:1                   | 30                                | 1.4 (± 0.2)                                                 | Yes (3/3)                                       | Yes (3/3) |
|                                  | 1.0%                 | Tissue culture fluid    | 10:1                   | 30                                | 1.5 (± 0.2)                                                 | Yes (3/3)                                       | Yes (3/3) |
|                                  | 2.0%                 | Tissue culture fluid    | 10:1                   | 30                                | 1.6 (± 0.2)                                                 | Yes (3/3)                                       | Yes (3/3) |

549 † - limit of detection in TCID50 assay was 5 TCID50/mL (0.7 Log10 TCID50/mL)  
550 ‡ - ice cold methanol.

551 **Supplementary Table 1: Reagent Details**

| Reagent Type                     | Reagent                                               | Manufacturer Cat#               | Reagent composition                                                                         | Recommended ratio of sample to reagent                                     | Recommended contact time |
|----------------------------------|-------------------------------------------------------|---------------------------------|---------------------------------------------------------------------------------------------|----------------------------------------------------------------------------|--------------------------|
| Specimen Transport Tube Reagents | Virus Transport and Preservation Medium (Inactivated) | BioComma Ltd. #YMJ-E            | Not known                                                                                   | Swab placed directly into tube containing 3mL reagent                      | None given               |
|                                  | Sigma MM                                              | Medical Wire #MWMM              | Guanidine thiocyanate, Ethanol (concentrations unknown)                                     | Up to 1 vol sample to 1.5 vols reagent (up to 0.67:1)                      | None given               |
|                                  | eNAT                                                  | Copan #608CS01R                 | 42.5-45% guanidine thiocyanate, detergent, Tris-EDTA, HEPES.                                | Swab placed directly into tube containing 1 or 2mL reagent. For urine, 3:1 | None given               |
|                                  | Primestore                                            | Longhorn #PS-MTM-3              | <50% guanidine thiocyanate, <23% ethanol                                                    | 1:3                                                                        | None given               |
|                                  | Cobas PCR                                             | Roche #08042969001              | ≤40% guanidine hydrochloride, Tris-HCl                                                      | Swab placed directly into tube                                             | None given               |
|                                  | Aptima Specimen Transport Medium                      | Hologic #PRD-03546              | Not known                                                                                   | Swab OR 0.5mL VTM sample added to tube containing 2.9mL buffer             | None given               |
|                                  | DNA/RNA Shield                                        | Zymo Research #R1100            | Not known                                                                                   | 1:3                                                                        | None given               |
|                                  | 40% GHCL                                              | Oxoid/Thermo Fisher #EB1351A    | 28.3% guanidine hydrochloride, 2.1% Triton X-100, Tris-EDTA                                 | Swab placed directly into tube                                             | None given               |
|                                  | 2M GITC                                               | Oxoid/Thermo Fisher #EB1349A    | 18.9% guanidine thiocyanate, 2.4% Triton X-100, Tris-EDTA                                   | Swab placed directly into tube                                             | None given               |
|                                  | 4M GITC                                               | Oxoid/Thermo Fisher #EB1350A    | 31.8% guanidine thiocyanate, 2.0% Triton X-100, Tris-EDTA                                   | Swab placed directly into tube                                             | None given               |
| Molecular Extraction Reagents    | NucliSENS Lysis Buffer                                | Biomerieux #200292              | 50% guanidine thiocyanate, <2% Triton X-100, <1% EDTA                                       | 1:2-1:200                                                                  | 10 mins                  |
|                                  | Panther Fusion                                        | Hologic #PRD-04339              | Not known                                                                                   | 1:1.42                                                                     |                          |
|                                  | Buffer AVL                                            | QIAGEN #19073                   | 50-70% guanidine thiocyanate                                                                | 1:4                                                                        | 10 mins                  |
|                                  | MagNA Pure 96 External Lysis Buffer                   | Roche #06374913001              | 30-50% guanidine thiocyanate, 20-25% Triton X-100, <100mM Tris-HCl, 0.01% bromophenol blue. | 1:1                                                                        | None given               |
|                                  | Buffer AL                                             | QIAGEN #19075                   | 30-50% guanidine hydrochloride, 0.1-1% maleic acid                                          | 1:1                                                                        | None given               |
|                                  | Cobas Omni LYS                                        | Roche #06997538190              | 30-50% guanidine thiocyanate, 3-5% dodecyl alcohol, ethoxylated, 1-2.5% dithiothreitol      | No instructions for use as off-board lysis buffer                          | None available           |
|                                  | L6 (Kingfisher formulation)                           | PHE Media Services              | 96.6% guanidine thiocyanate, 1.9% Triton X-100, Tris-EDTA                                   | None available                                                             | None available           |
|                                  | Buffer RLT                                            | QIAGEN #79216                   | 30-50% guanidine thiocyanate                                                                | Tissue to be homogenized directly in undiluted buffer                      | None given               |
|                                  | NeuMoDx Viral Lysis Buffer                            | NeuMoDx Molecular, Inc. #401600 | <50% guanidine hydrochloride, <5% Tween 20, <1% EDTA, <0.1% sodium azide                    | 1:1                                                                        | None given               |
|                                  | VPSS                                                  | E&O Laboratories #BM1675        | Not known                                                                                   | Not known                                                                  | Not known                |
| Lysis Buffer                     | E&O Laboratories #BM1676                              | Not known                       | Not known                                                                                   | Not known                                                                  |                          |



553

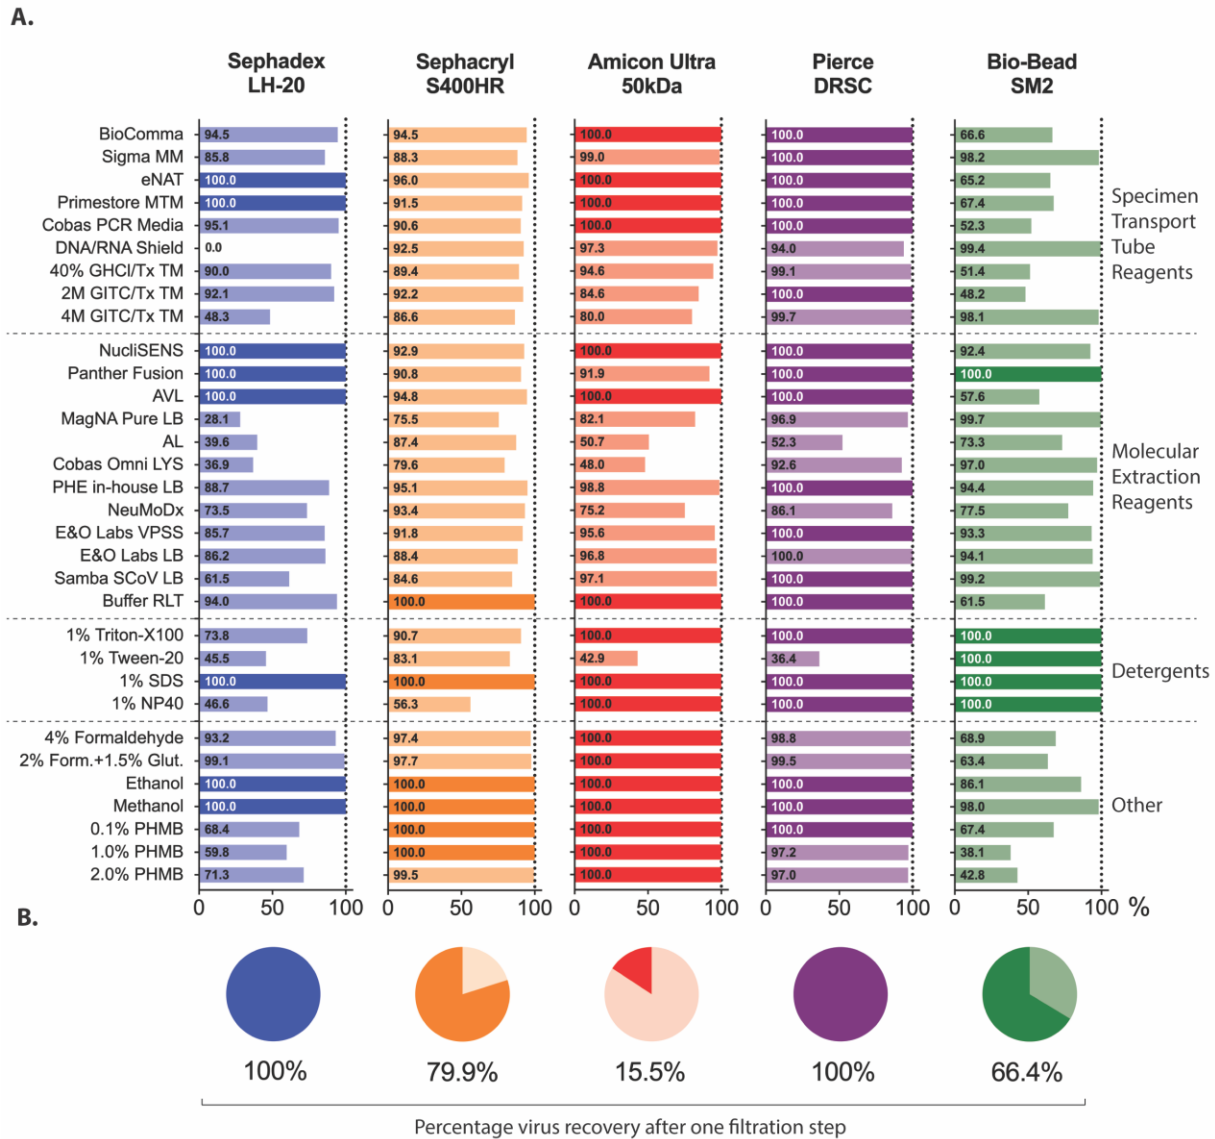

554

555 **Figure 1: Effectiveness of five filtration matrices at removing cytotoxicity.** (A) SARS-CoV-2  
 556 virus in clarified cell culture supernatant was treated with indicated reagent for 2mins at room  
 557 temperature before being purified through one of 5 filtration matrices: Sephadex LH-20 (blue);  
 558 Sephacryl S400HR (orange); Amicon Ultra 50kDa molecular weight cut off (red); Pierce  
 559 detergent removal spin columns (DRSC) (purple); or Bio-Bead SM2 (green). Values indicate the  
 560 percentage toxicity removal after one purification cycle relative to unpurified samples (based on  
 561 CC20 values – for more details see Table 1). (B) Percentage of input virus remaining in eluate  
 562 after one purification cycle through each filtration matrix. GHCl - guanidine hydrochloride;  
 563 GITC - guanidinium isothiocyanate; Tx – Triton X-100; PHMB - polyhexamethylene biguanide;  
 564 SDS - sodium dodecyl sulfate; NP40 - nonyl phenoxy polyethoxy ethanol. LB – lysis buffer; TM  
 565 – transport medium  
 566

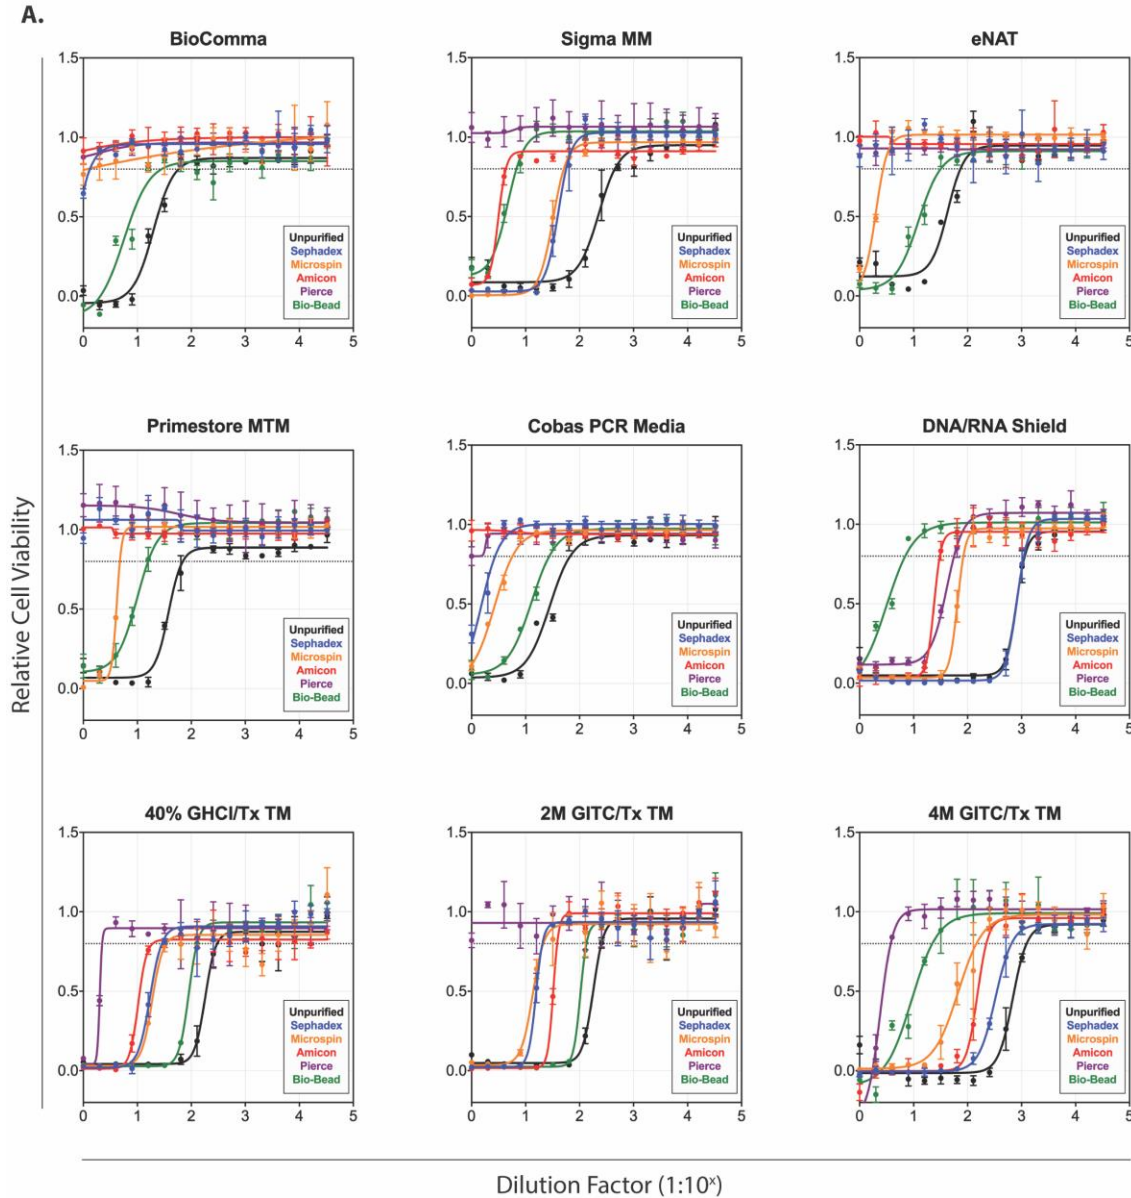

567

568 **Supplementary Figure 1: Cytotoxicity of virus inactivation reagents after passing through**  
 569 **purification matrices.** Concentration-response curves in Vero cells treated with a 2-fold serial  
 570 dilution of reagent. At 24 h post treatment cell viability was determined, with values normalized  
 571 to mock treated cells. Each point represents the mean of triplicate wells, with error bars  
 572 indicating standard deviation. Graphs are representative of at least 2 independent experiments.  
 573 Matrices used: Sephadex LH-20 (blue); Sephacryl S400HR (orange); Amicon Ultra 50kDa  
 574 molecular weight cut off (red); Pierce detergent removal spin columns (DRSC) (purple); or Bio-  
 575 Bead SM2 (green). (A) Reagents used in specimen transport tubes: GHCl - guanidine  
 576 hydrochloride; GITC - guanidinium isothiocyanate; Tx – Triton X-100; TM – Transport Medium  
 577 (B) Reagents used in molecular extraction protocols: PHMB - polyhexamethylene biguanide. (C)  
 578 Detergents commonly used for virus inactivation: SDS - sodium dodecyl sulfate; NP40 - nonyl  
 579 phenoxyethoxyethanol. (D) Other reagents commonly used for virus inactivation.  
 580

B.

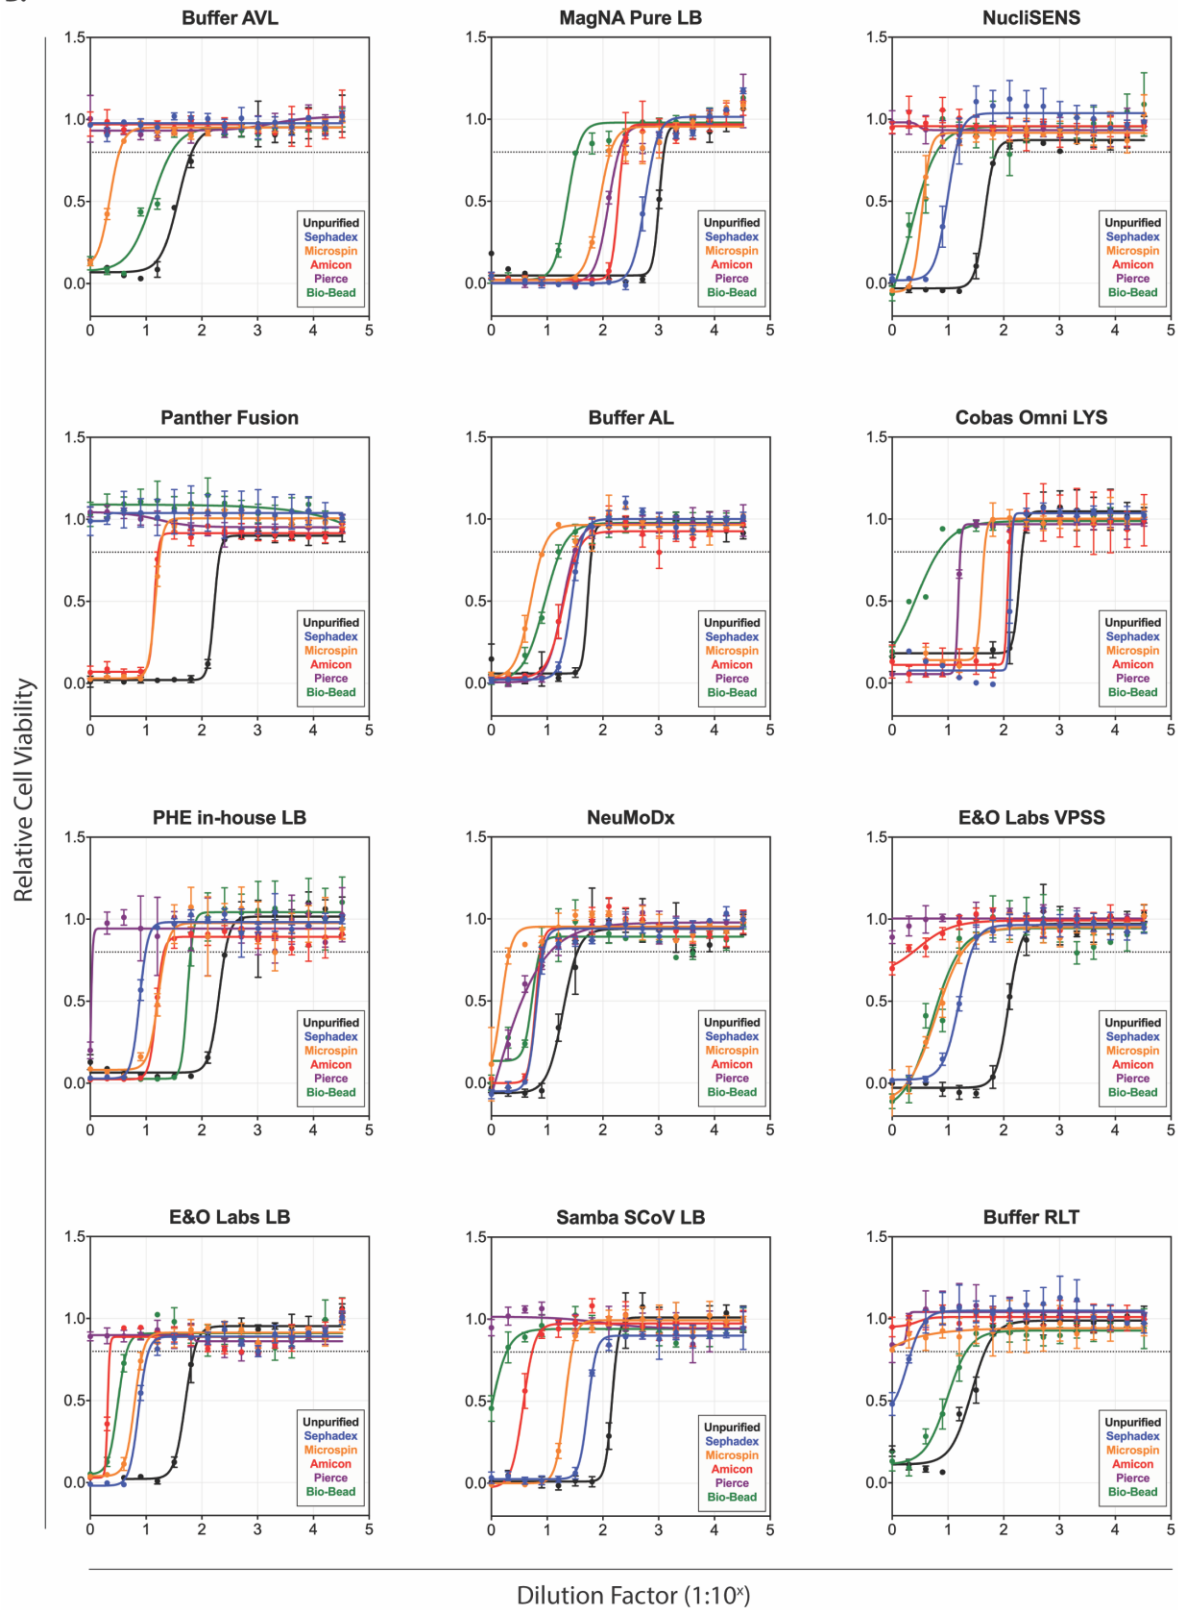

581  
582

C.

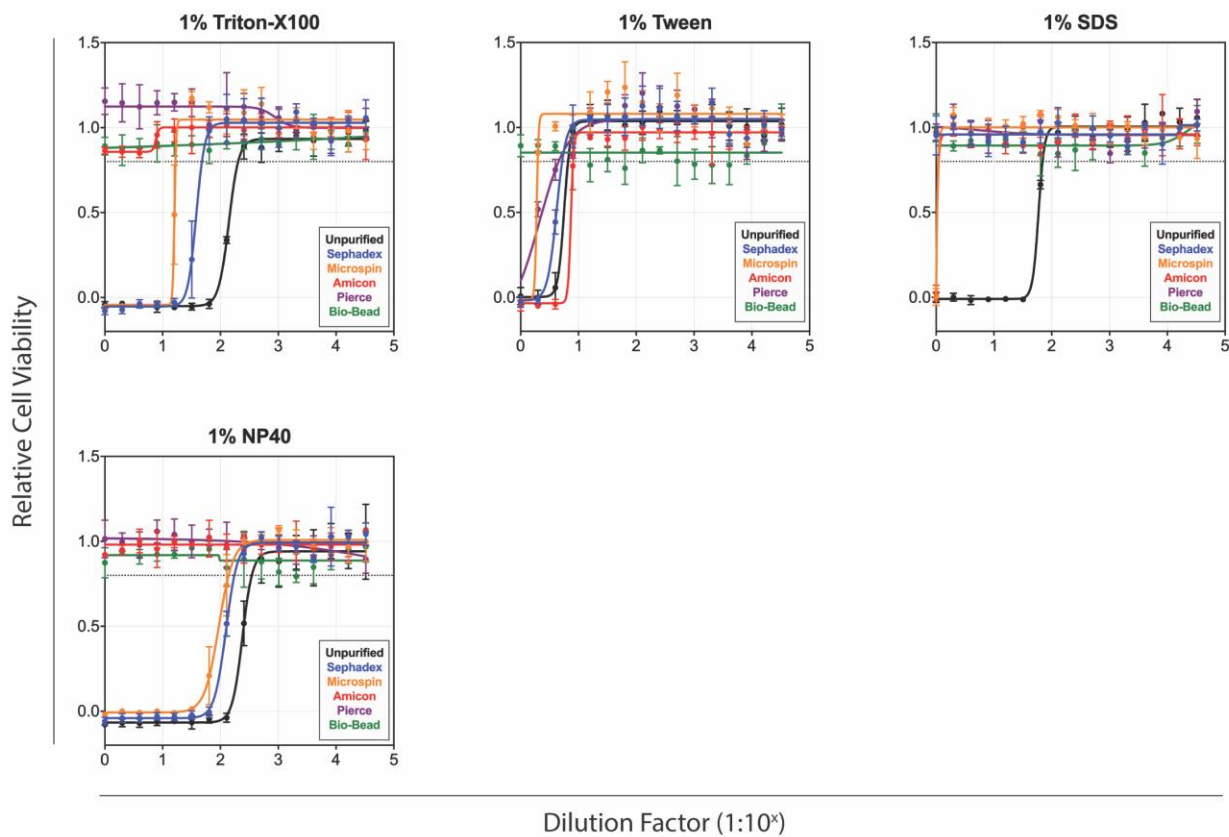

583  
584

D.

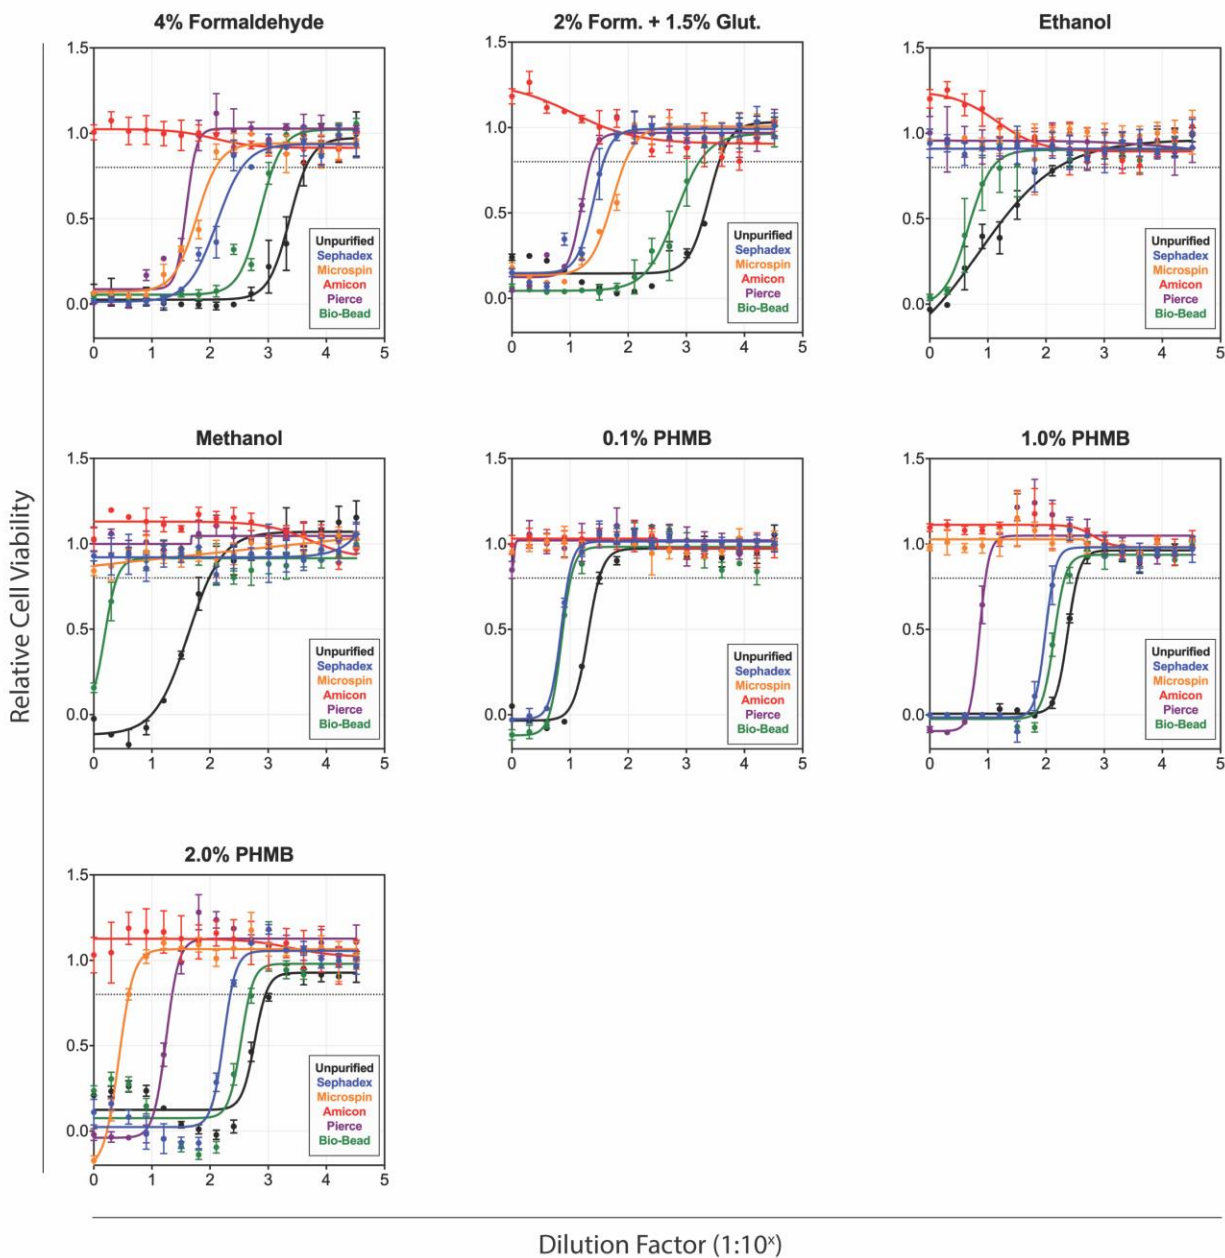

585  
586
